# Supplementary material for: RasGRP3 limits Toll-like receptor-triggered inflammatory response in macrophages by activating Rap1 small GTPase
Source: PubMed Central journal article supplement (PMC4143924; doi:10.1038/ncomms5657), 2014-08-14
Supplement: ncomms5657-s1.pdf [file ncomms5657-s1.pdf]

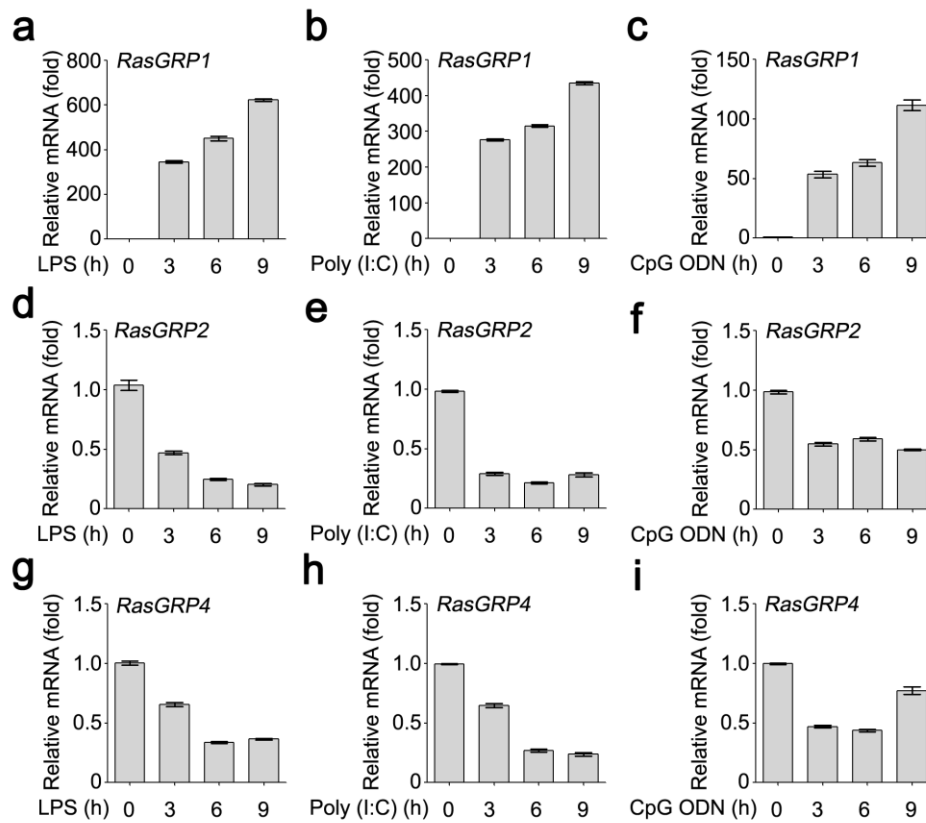

**Supplementary Figure 1. RasGRP1, RasGRP2 and RasGRP4 expression levels in mouse macrophages.** Peritoneal macrophages derived from C57BL/6 wild type mice were treated with or without 100 ng/ml LPS (**a, d, g**), 10  $\mu$ g/ml Poly (I:C) (**b, e, h**) or 5  $\mu$ M CpG ODN (**c, f, i**) as indicated. The mRNA levels of *RasGRP1* (**a-c**), *RasGRP2* (**d-f**) and *RasGRP4* (**g-i**) were examined by Q-PCR. Data are presented as mean $\pm$ s.d. of triplicate samples and are representative of three independent experiments.

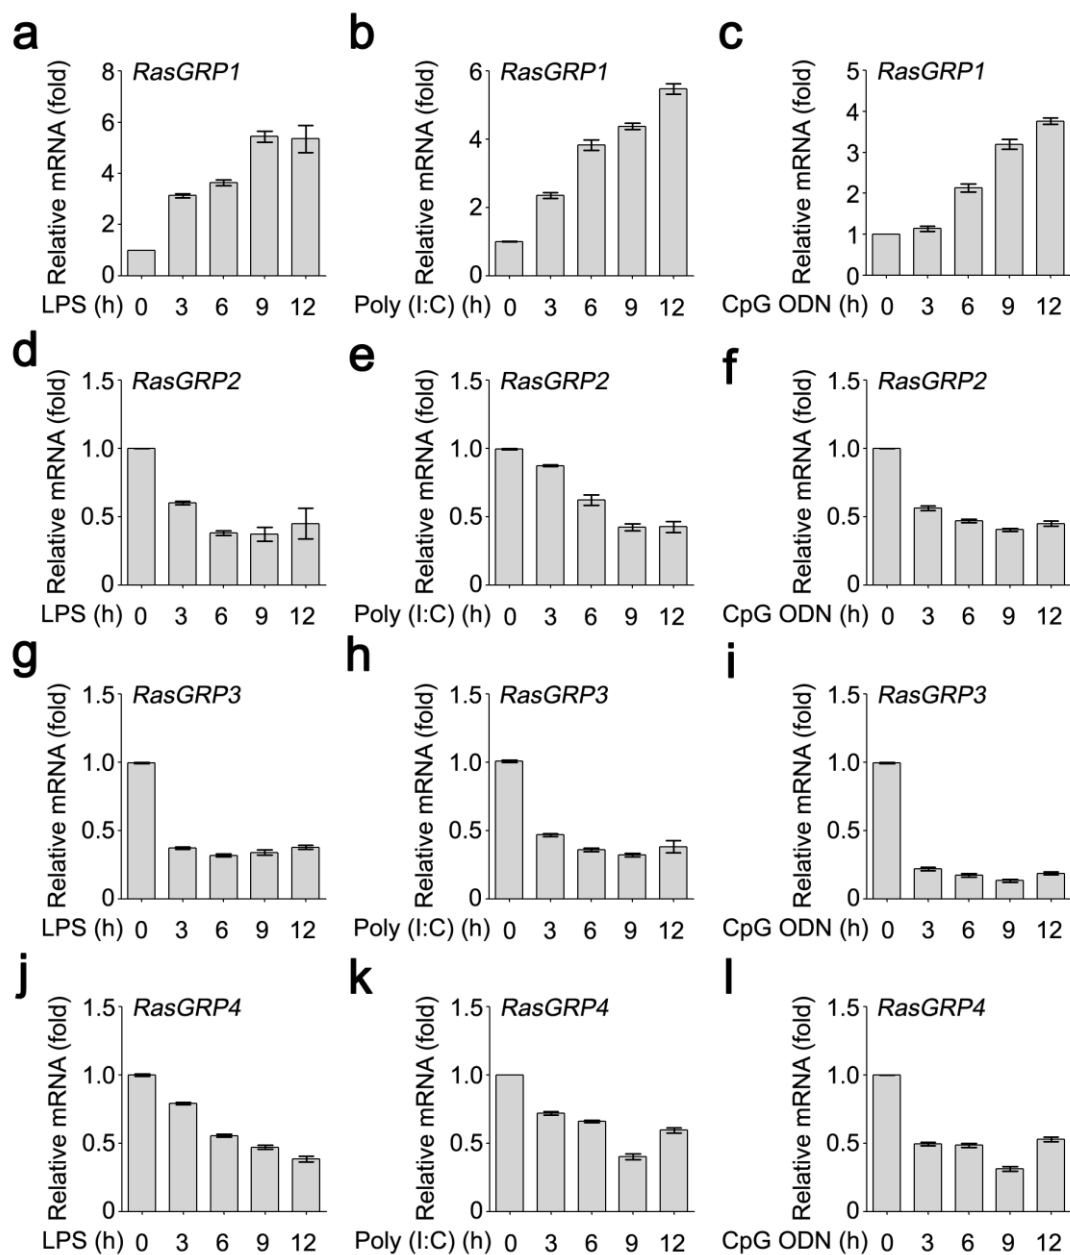

**Supplementary Figure 2. RasGRP1-4 expression levels in PMA-differentiated THP-1 cells.** THP-1 cells differentiated with 0.5 ng/ml PMA for 12h were treated with or without 100 ng/ml LPS (**a, d, g, j**), 10  $\mu$ g/ml Poly (I:C) (**b, e, h, k**) or 5  $\mu$ M CpG ODN (**c, f, i, l**) as indicated. The mRNA levels of *RasGRP1* (**a-c**), *RasGRP2* (**d-f**), *RasGRP3* (**g-i**) and *RasGRP4* (**j-l**) were examined by Q-PCR. Data are presented as mean $\pm$ s.d. of triplicate samples and are representative of three independent experiments.

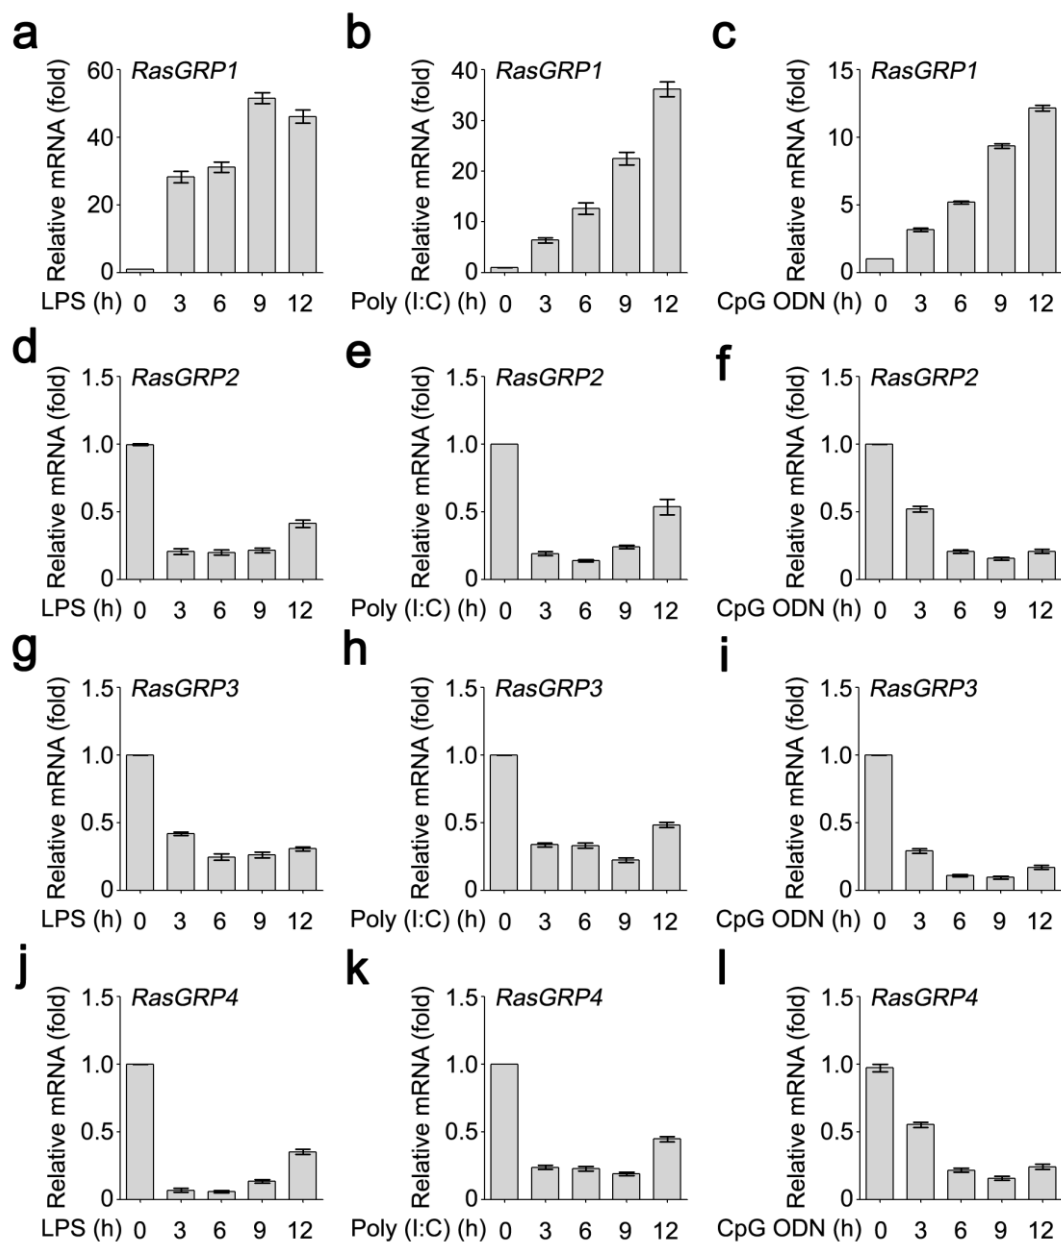

**Supplementary Figure 3. RasGRP1-4 expression levels in human monocyte-derived macrophages.** Human monocyte-derived macrophages were treated with or without 100 ng/ml LPS (**a, d, g, j**), 10  $\mu$ g/ml Poly (I:C) (**b, e, h, k**) or 5  $\mu$ M CpG ODN (**c, f, i, l**) as indicated. The mRNA levels of *RasGRP1* (**a-c**), *RasGRP2* (**d-f**), *RasGRP3* (**g-i**) and *RasGRP4* (**j-l**) were examined by Q-PCR. Data are presented as mean $\pm$ s.d. of triplicate samples and are representative of three independent experiments.

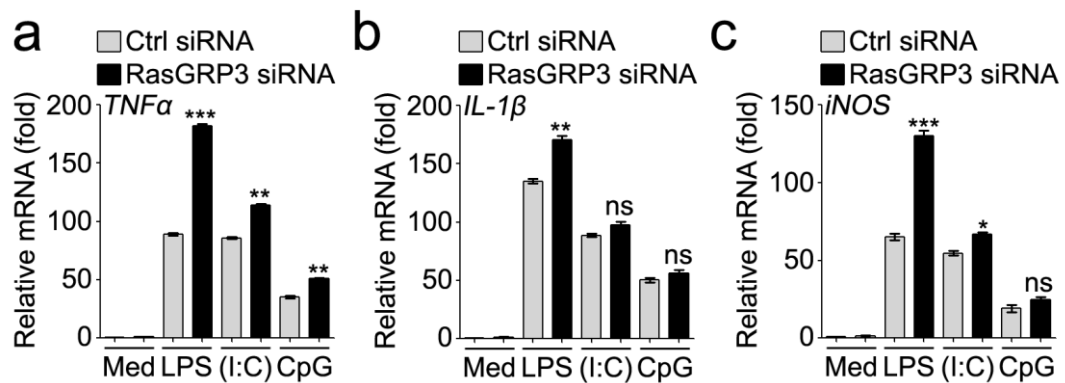

**Supplementary Figure 4. Knockdown of RasGRP3 promotes the expression of *TNF $\alpha$*  and *iNOS* in macrophages.** Peritoneal macrophages were transiently transfected with control (Ctrl) or RasGRP3-specific siRNAs for 48h. Cells were treated with 1 ng/ml LPS, 2.5  $\mu$ g/ml Poly (I:C) or 0.5  $\mu$ M CpG ODN for 2h (for *TNF $\alpha$*  mRNA) or 6h. Then mRNA levels of *TNF $\alpha$*  (a), *IL-1 $\beta$*  (b) and *iNOS* (c) were determined by Q-PCR. Data are presented as mean $\pm$ s.d. of triplicate samples and are representative of three independent experiments. ns, not significant; \*,  $P < 0.05$ ; \*\*,  $P < 0.01$ ; \*\*\*,  $P < 0.001$  (ANOVA).

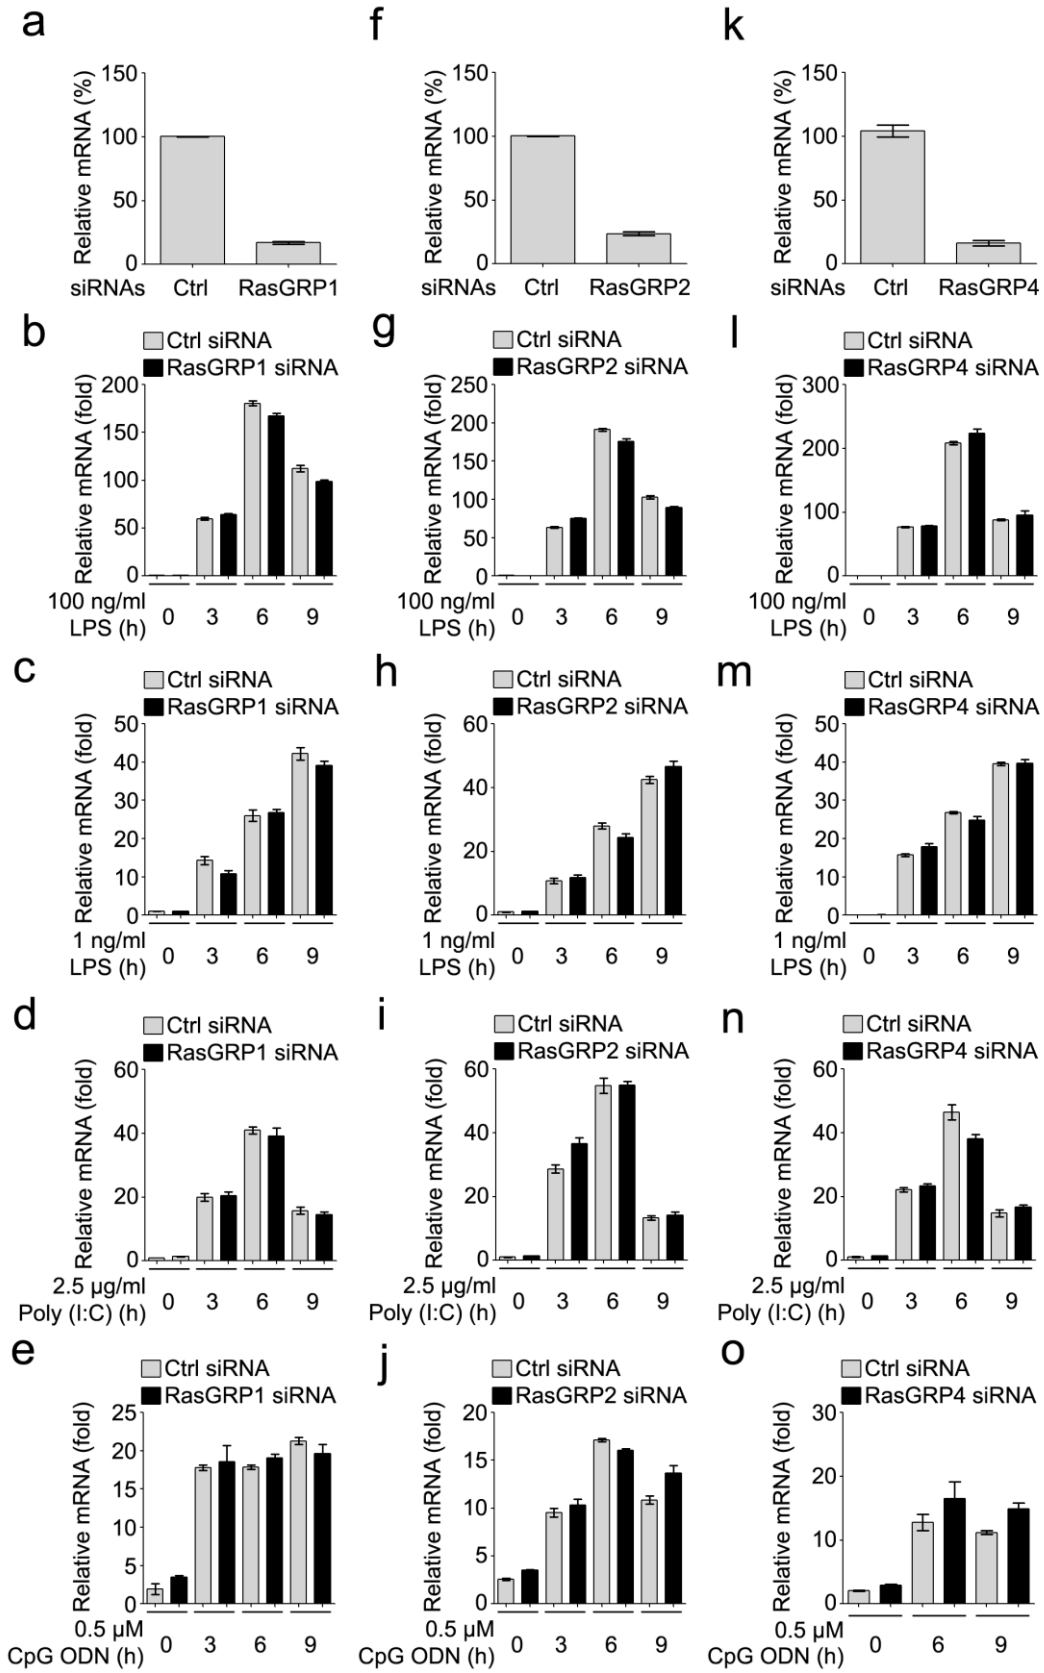

**Supplementary Figure 5. Knockdown of RasGRP1, RasGRP2 or RasGRP4 does not affect IL-6 production in mouse macrophages. (a-e) Peritoneal macrophages**

were transiently transfected with control (Ctrl) or siRNAs for RasGRP1 for 48h. Efficiencies of siRNAs were determined by Q-PCR (**a**). Cells were treated with 100 ng/ml (**b**), 1 ng/ml LPS (**c**), 2.5 µg/ml Poly (I:C) (**d**) or 0.5 µM CpG ODN (**e**) as indicated. Then mRNA levels of *IL-6* were determined by Q-PCR (**b-e**). (**f-j**) Peritoneal macrophages were transiently transfected with control (Ctrl) or siRNAs for RasGRP2 for 48h. Efficiencies of siRNAs were determined by Q-PCR (**f**). Cells were treated and then examined for *IL-6* mRNA as in (**b-e**). (**k-o**) Peritoneal macrophages were transiently transfected with control (Ctrl) or siRNAs for RasGRP4 for 48h. Efficiencies of siRNAs were determined by Q-PCR (**k**). Cells were treated and then examined for *IL-6* mRNA as in (**b-e**). Data are presented as mean±s.d. of triplicate samples and are representative of three independent experiments.

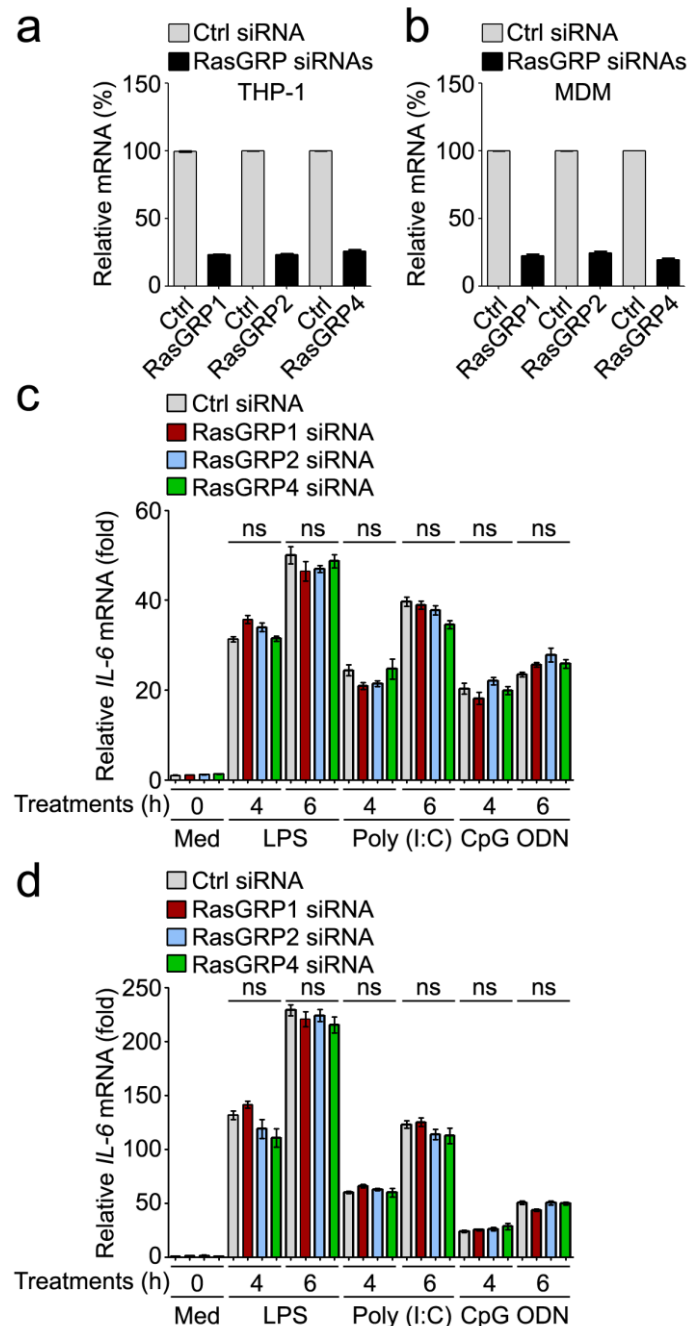

**Supplementary Figure 6. Knockdown of RasGRP1, RasGRP2 or RasGRP4 does not affect IL-6 production in human macrophages.** (a, b) THP-1 cells differentiated with 0.5 ng/ml PMA for 12h (a) or human monocyte-derived macrophages (b) were transiently transfected with control (Ctrl) or siRNAs for *RasGRP1*, *RasGRP2* or *RasGRP4* for 48h. Efficiencies of siRNAs were determined by Q-PCR. (c, d) THP-1 cells (c) as in (a) and MDM (d) as in (b) were treated with or without (Med) 1 ng/ml LPS, 2.5  $\mu$ g/ml Poly (I:C) or 0.5  $\mu$ M CpG ODN as indicated. Then mRNA levels of *IL-6* were determined by Q-PCR. Data are presented as mean $\pm$ s.d. of triplicate samples. ns, not significant (ANOVA).

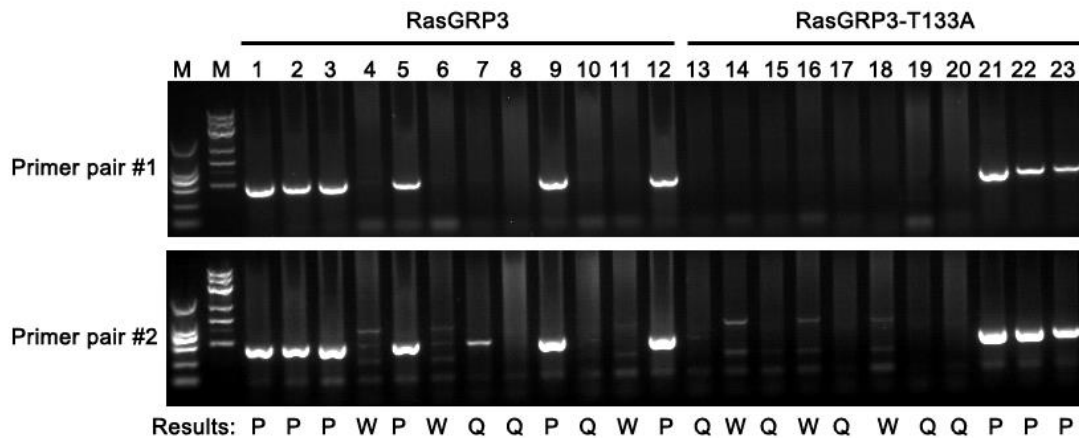

**Supplementary Figure 7. Characterization of RasGRP3 transgenic mice.** Genomic DNA derived from tails of RasGRP3 or RasGRP3-T133A transgenic mice were examined by PCR. The PCR results were evaluated as indicated in the bottom (“P” for positive, “W” for wild type, and “Q” for suspicions of DNA degradation or low DNA concentration that need a second validation using another DNA sample). Only the mice showing strong positive results by using both pairs of primers were regarded as transgenic mice and used in the study.



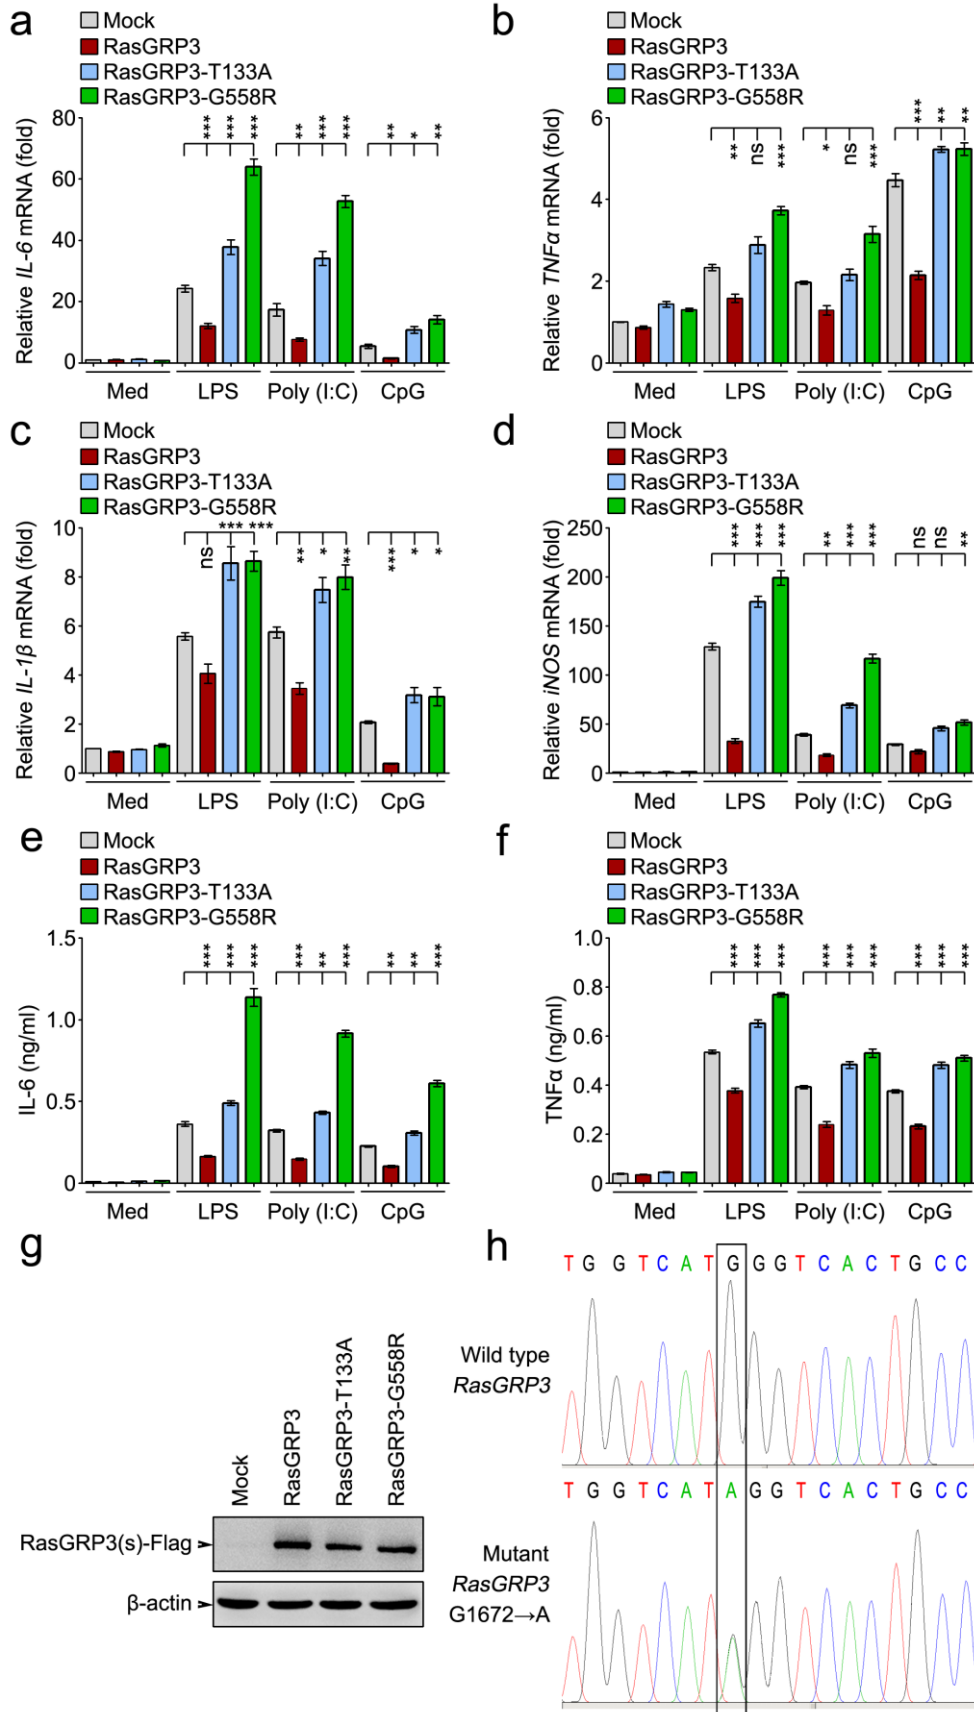

Supplementary Figure 8. RasGRP3 inhibits production of inflammatory

**cytokines in THP-1 cells.** (a-f) THP-1 cells differentiated with 0.5 ng/ml PMA for 12h were treated with or without (Med) 1 ng/ml LPS, 2.5 µg/ml Poly (I:C) or 0.5 µM CpG ODN as indicated. Then mRNA levels of indicated factors were determined by Q-PCR (a-d). IL-6 and TNFα in the culture supernatants were measured by ELISA (e, f). Data are presented as mean±s.d. of triplicate samples. ns, not significant; \*,  $P < 0.05$ ; \*\*,  $P < 0.01$ ; \*\*\*,  $P < 0.001$  (ANOVA). (g) Western blot assays of RasGRP3 (mutant) overexpression. (h) DNA sequencing results of a RasGRP3 mutation (G1672 mutated to A, resulting in G558R mutation of RasGRP3) in a colon cancer patient. The mutated nucleic acid was boxed. Data are representative of three independent experiments.

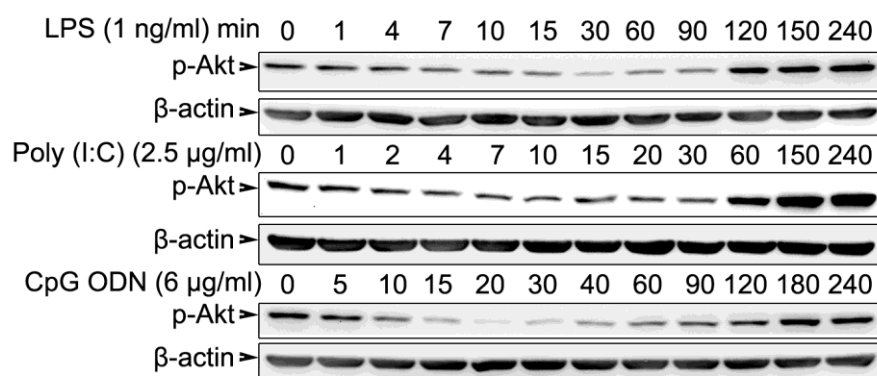

**Supplementary Figure 9. The dephosphorylation and rephosphorylation of Akt after treatments with low levels of TLR agonists in macrophages.** Peritoneal macrophages were treated as indicated. Phosphorylation of Akt (Ser473) was evaluated by Western blot. Data are representative of three independent experiments.

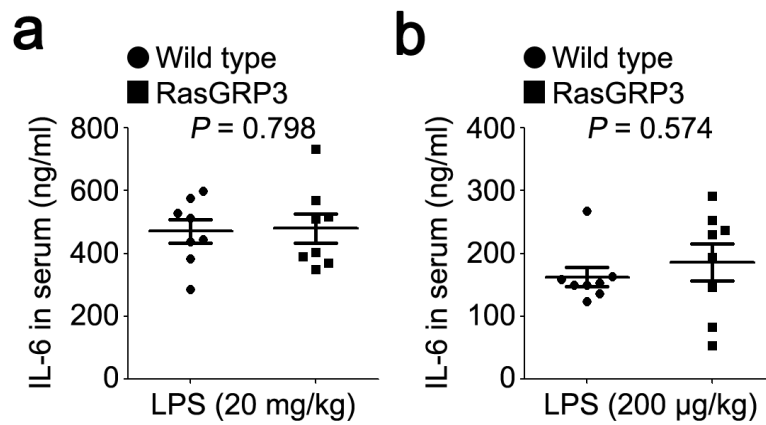

**Supplementary Figure 10. IL-6 levels in the serum of wild type mice or RasGRP3 transgenic mice.** Indicated mice were intraperitoneally injected with 20 mg/kg (a) or 200 µg/kg (b) LPS for 2.5h. IL-6 levels in serum were determined by ELISA. Data are presented as mean±s.d. of 8 mice per group (Mann-Whitney U test). Data are representative of three independent experiments.

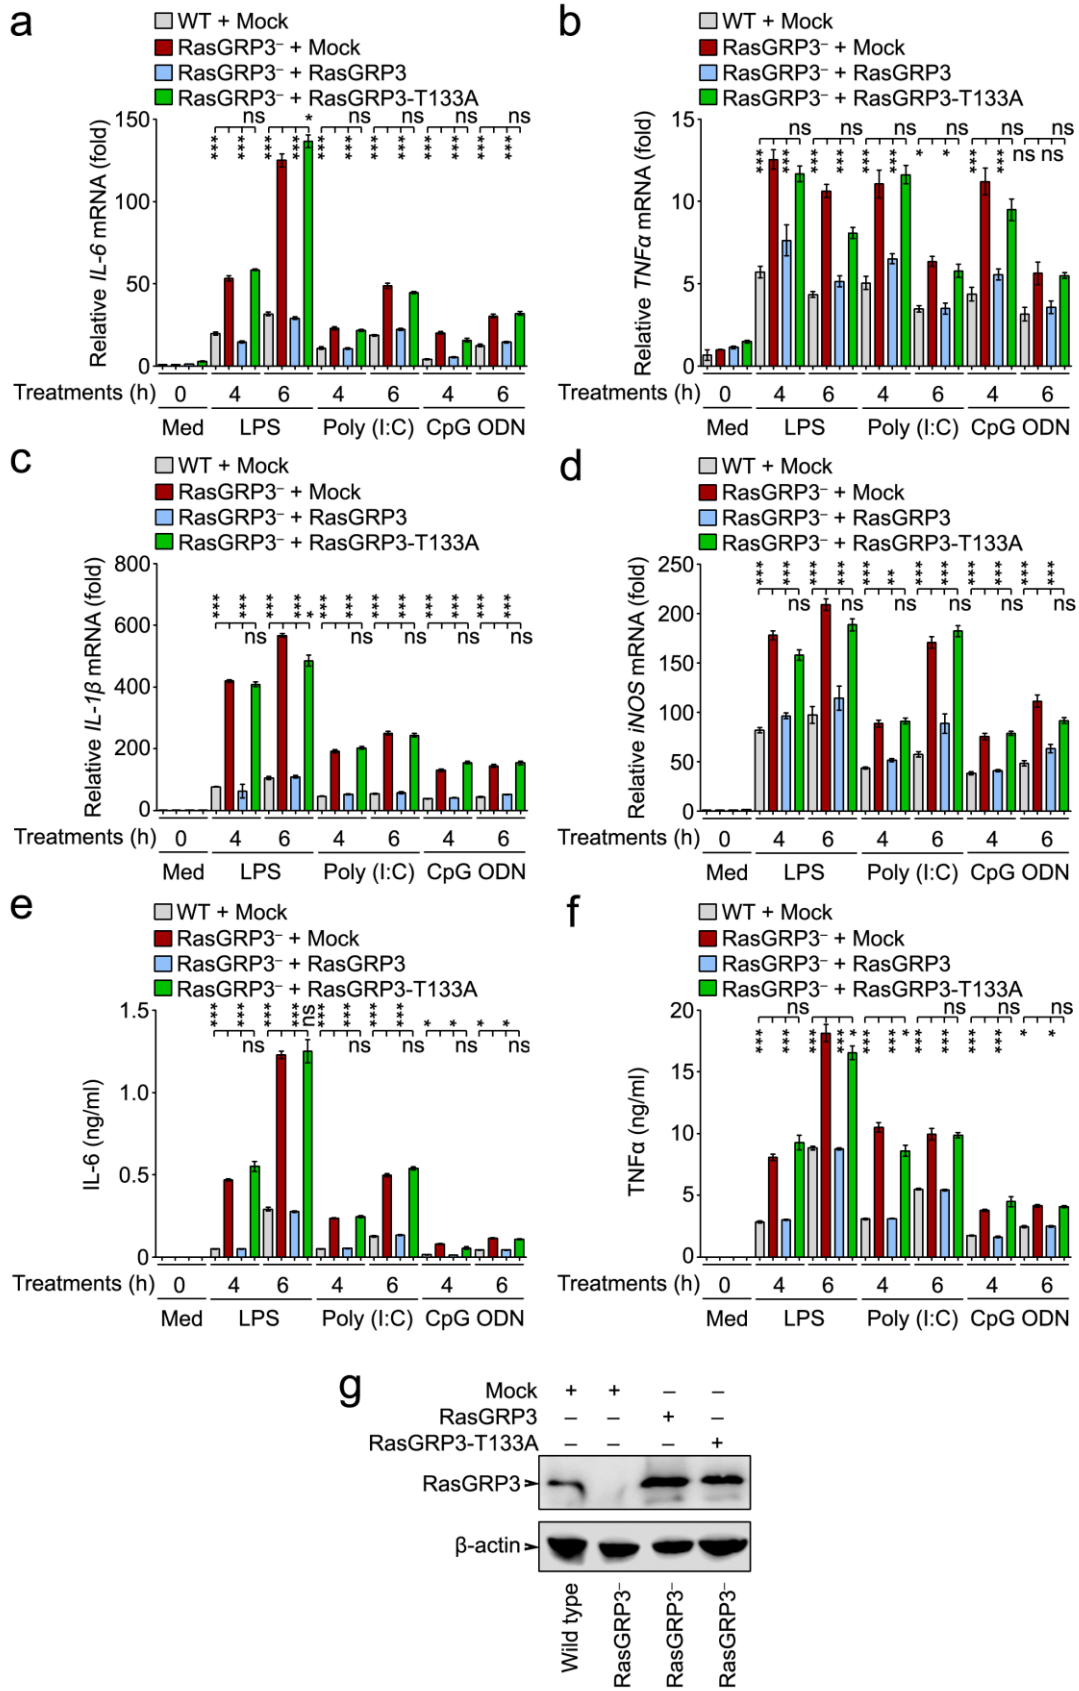

**Supplementary Figure 11. Rescue experiments using RasGRP3 overexpression in RasGRP3-deficient RAW264.7 cells. (a-f) Wild type (WT) or RasGRP3<sup>-</sup>**

RAW264.7 cells were transfected with indicated vectors. 48h later, cells were treated with or without (Med) 1 ng/ml LPS, 2.5 µg/ml Poly (I:C) or 0.5 µM CpG ODN as indicated. Then mRNA levels of indicated factors were determined by Q-PCR (**a-d**). IL-6 and TNFα in the culture supernatants were measured by ELISA (**e, f**). Data are presented as mean±s.d of triplicate samples. ns, not significant; \*,  $P < 0.05$ ; \*\*,  $P < 0.01$ ; \*\*\*,  $P < 0.001$  (ANOVA). (**g**) Western blot assays of RasGRP3 (mutant) overexpression. Data are representative of three independent experiments.



**Supplementary Table 1. Primers used in vector construction.**

| Vector     | Forward Primer (5'→3')            | Reverse Primer (5'→3') |
|------------|-----------------------------------|------------------------|
| Mouse      | GGCCTCGAGATGGATTATAAGGCATTCGACAAC | GTGGAATTCTCAGCCATCCTC  |
| RasGRP3-FI | TGGGGTCCAACGGGCTCGGGAAAGC         | ACCACCCTGCTTGGCT       |
| ag         |                                   |                        |
| Mouse      | GACTGGATGAGGAGAGTCGCACAGAGGAAAAA  | GATACTTTTTTCTCTGTGCG   |
| RasGRP3-T  | GTAT                              | ACTCTCCTCATCCAGT       |
| 133A-Flag  |                                   |                        |
| Human      | GGCCTCGAGGCCATGATGGACTACAAGGATGAC | GTGGAATTCCACAAGCCAAC   |
| RasGRP3-FI | GATGACAAGGGATCAAGTGGCCTTGG        | ATTATTGCCTTCAGTT       |
| ag         |                                   |                        |
| Human      | ACTGGATGAGAAGAGTCGCACAGAGGAAAAAAG | ACTTTTTTCTCTGTGCGACT   |
| RasGRP3-T  | T                                 | CTTCTCATCCAGT          |
| 133A-Flag  |                                   |                        |
| Human      | CTTGAGCAGTGGTCATAGGTCCTGGAAG      | CTTCCAGGCAGTGACCTATG   |
| RasGRP3-G  |                                   | ACCACTGCTCAAG          |
| 558R-Flag  |                                   |                        |



**Supplementary Table 2. Primers used in Q-PCR assays.**

| <b>Gene Target</b>                    | <b>Forward Primer (5'→3')</b> | <b>Reverse Primer (5'→3')</b> |
|---------------------------------------|-------------------------------|-------------------------------|
| Mouse <i>RasGRP1</i>                  | ACTGCCACCTCATCGACAC           | CACTTTGCGCTTCTTGCTAGTA        |
| Mouse <i>RasGRP2</i>                  | GCTCCGTGGTTGCATCGAA           | CTGTGGATCTCGCACCTTTCC         |
| Mouse <i>RasGRP3</i>                  | GGGAAAGCGGCAACACTAGAT         | GGGCAAGTAACTGTCGTTCA          |
| Mouse <i>RasGRP4</i>                  | TGGCGTCCATGAATCTGGG           | CGGATACATTCTCCAATAGCTC        |
| Mouse <i>Rap1a</i>                    | CAGGAACCGAGCAATTTACAGC        | TGTTCTTTGCCAACTACCCGT         |
| Mouse <i>IL-6</i>                     | GAGTTGTGCAATGGCAATTCTG        | GCAAGTGCATCATCGTTGTTTAT       |
| Mouse <i>TNF<math>\alpha</math></i>   | CCCTCACACTCAGATCATCTTCT       | GCTACGACGTGGGCTACAG           |
| Mouse <i>IL-1<math>\beta</math></i>   | GAAATGCCACCTTTTGACAGTG        | CTGGATGCTCTCATCAGGACA         |
| Mouse <i>iNOS</i>                     | ACATCGACCCGTCCACAGTAT         | CAGAGGGGTAGGCTTGCTC           |
| Mouse <i><math>\beta</math>-actin</i> | AGTGTGACGTTGACATCCGT          | GCAGCTCAGTAACAGTCCGC          |
| Human <i>RasGRP1</i>                  | CAGGAACTGGTGAAAGCTAAGG        | AGTCACGGGCATTGATTTGAG         |
| Human <i>RasGRP2</i>                  | GAGCATCTCACCTACTTGGAGT        | AGCCATGAGTCACGAACTGT          |
| Human <i>RasGRP3</i>                  | GGGAAAAGCCTGTCTGCTGTT         | GCTCCAGAAAAGTGAGGTGCT         |
| Human <i>RasGRP4</i>                  | GTA CTGGCTGATGCGACACC         | GGCCAGAAAACGACCTATGAC         |
| Human <i>IL-6</i>                     | ACTCACCTCTTCAGAACGAATTG       | CCATCTTTGGAAGGTTCAAGTTG       |
| Human <i>TNF<math>\alpha</math></i>   | CCTCTCTCTAATCAGCCCTCTG        | GAGGACCTGGGAGTAGATGAG         |
| Human <i>IL-1<math>\beta</math></i>   | AGCTACGAATCTCCGACCAC          | CGTTATCCCATGTGTCAAGAA         |
| Human <i>iNOS</i>                     | TTCAGTATCACAACTCAGCAAG        | TGGACCTGCAAGTTAAAATCCC        |
| Human <i><math>\beta</math>-actin</i> | CATGTACGTTGCTATCCAGGC         | CTCCTTAATGTCACGCACGAT         |

**Supplementary Table 3. siRNA sequences used in this study.**

| <b>siRNA Target</b> | <b>Sense (5'→3')</b>  | <b>Antisense (5'→3')</b> |
|---------------------|-----------------------|--------------------------|
| Mouse RasGRP1       | GCUCCAUCUAUCCAAGCUTT  | AGCUUGGAAUAGAUGGAGCTT    |
| Mouse RasGRP2       | GGCCUUAUUUAGUAGAGCUTT | AGCUCUACAUUUUAGGCCCTT    |
| Mouse RasGRP3       | GAGUCUGUGUUUCGAAACUTT | AGUUUCGAAACACAGACUCTT    |
| Mouse RasGRP4       | CACCUACCCAAGCUGAAUATT | UAUUCAGCUUGGGUAGGUGTT    |
| Mouse Rap1a         | GACCUGGUCAGACAGAUATT  | UUAUCUGUCUGACCAGGUCTT    |
| Mouse Rap1b         | GUGCGGCAAUUUACAGAATT  | UUCUGUUAAUUUGCCGCACTT    |
| Human RasGRP1       | GCGGGAUGAACUGUCACAATT | UUGUGACAGUUCAUCCCGCTT    |
| Human RasGRP2       | GCAUGGGCUUCGUACACAATT | UUGUGUACGAAGCCCAUGCTT    |
| Human RasGRP3       | GGAUCUCAUUCACUGAUUATT | UAAUCAGUGAAUGAGAUCCCTT   |
| Human RasGRP4       | GGACCUCUUCUACACGGAATT | UUCCGUGUAGAAGAGGUCCTT    |
| Control siRNA       | UUCUCCGAACGUGUCACGUTT | ACGUGACACGUUCGGAGAATT    |
